# Supplementary material
Source: PubMed Central journal article supplement (PMC5587856)
Supplement: cr201799x3.pdf [file cr201799x3.pdf]

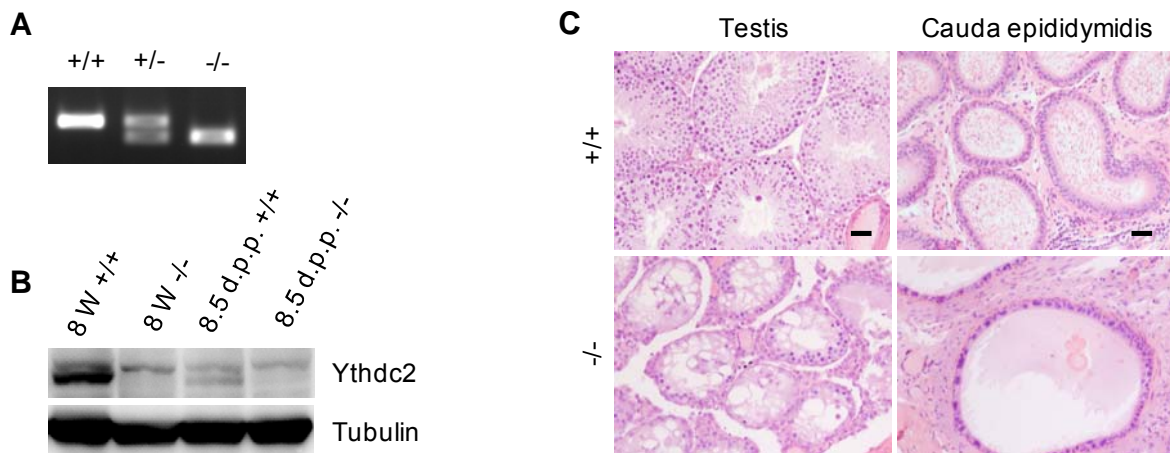

**Figure S3** Characterization of *Ythdc2*<sup>-/-</sup> mouse. **(A)** Genotyping results of offspring derived from founder mouse with 37-bp deletion. **(B)** Western blot analysis of *Ythdc2* in mouse testis protein extracts at the indicated postnatal ages. 8W, 8 week-old. d.p.p., days postpartum. **(C)** H&E staining of adult testes and epididymis of offspring of founder mouse with 4-bp deletion. Scale bar, 50  $\mu$ m.
