# Supplementary material
Source: PubMed Central journal article supplement (PMC5587856)
Supplement: cr201799x4.pdf [file cr201799x4.pdf]

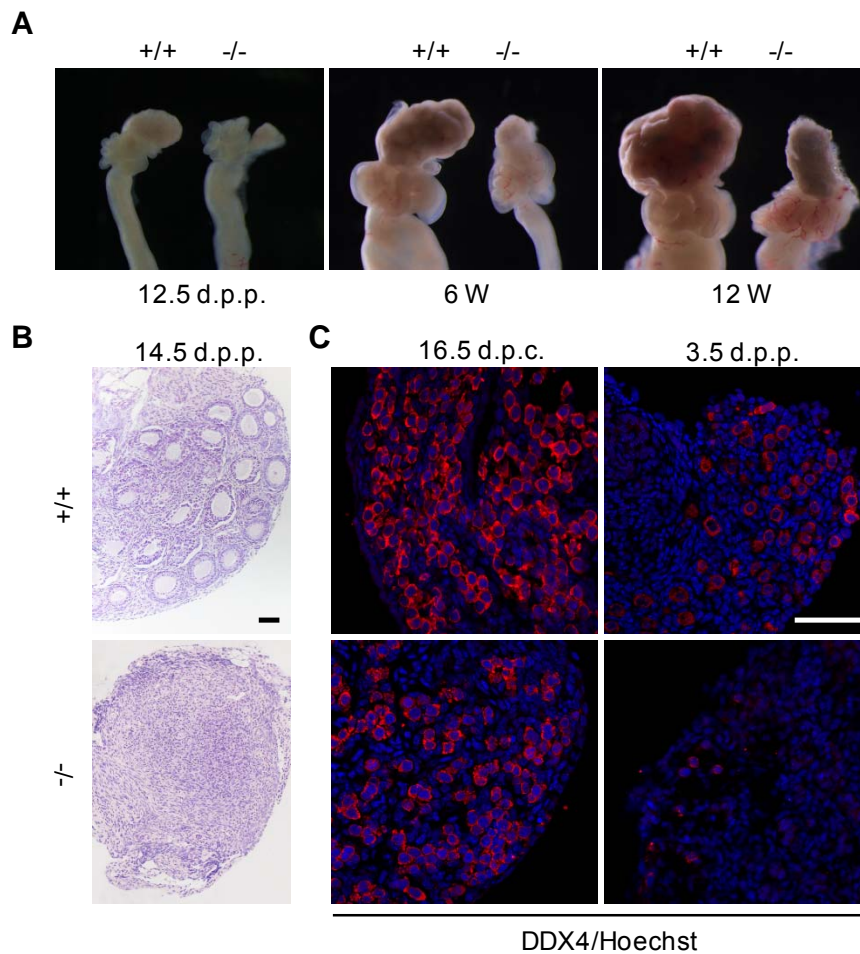

**Figure S4** Female *Ythdc2*<sup>-/-</sup> mice demonstrate defects in the ovaries. **(A)** Ovaries from *Ythdc2*<sup>-/-</sup> mice are smaller in size than wild type at 12.5 d.p.p., 6 week-old and 12 week-old. **(B)** H&E staining of 14.5 d.p.p. ovaries sections. **(C)** Histological sections of 16.5-d.p.c. and 3.5 d.p.p. *Ythdc2*<sup>+/+</sup> and *Ythdc2*<sup>-/-</sup> ovaries stained for DDX4 (red). DNA was stained with Hoechst (blue). D.p.c., days post conception. Scale bar, 50  $\mu$ m.
