# Supplementary material
Source: PubMed Central journal article supplement (PMC5587856)
Supplement: cr201799x7.pdf [file cr201799x7.pdf]

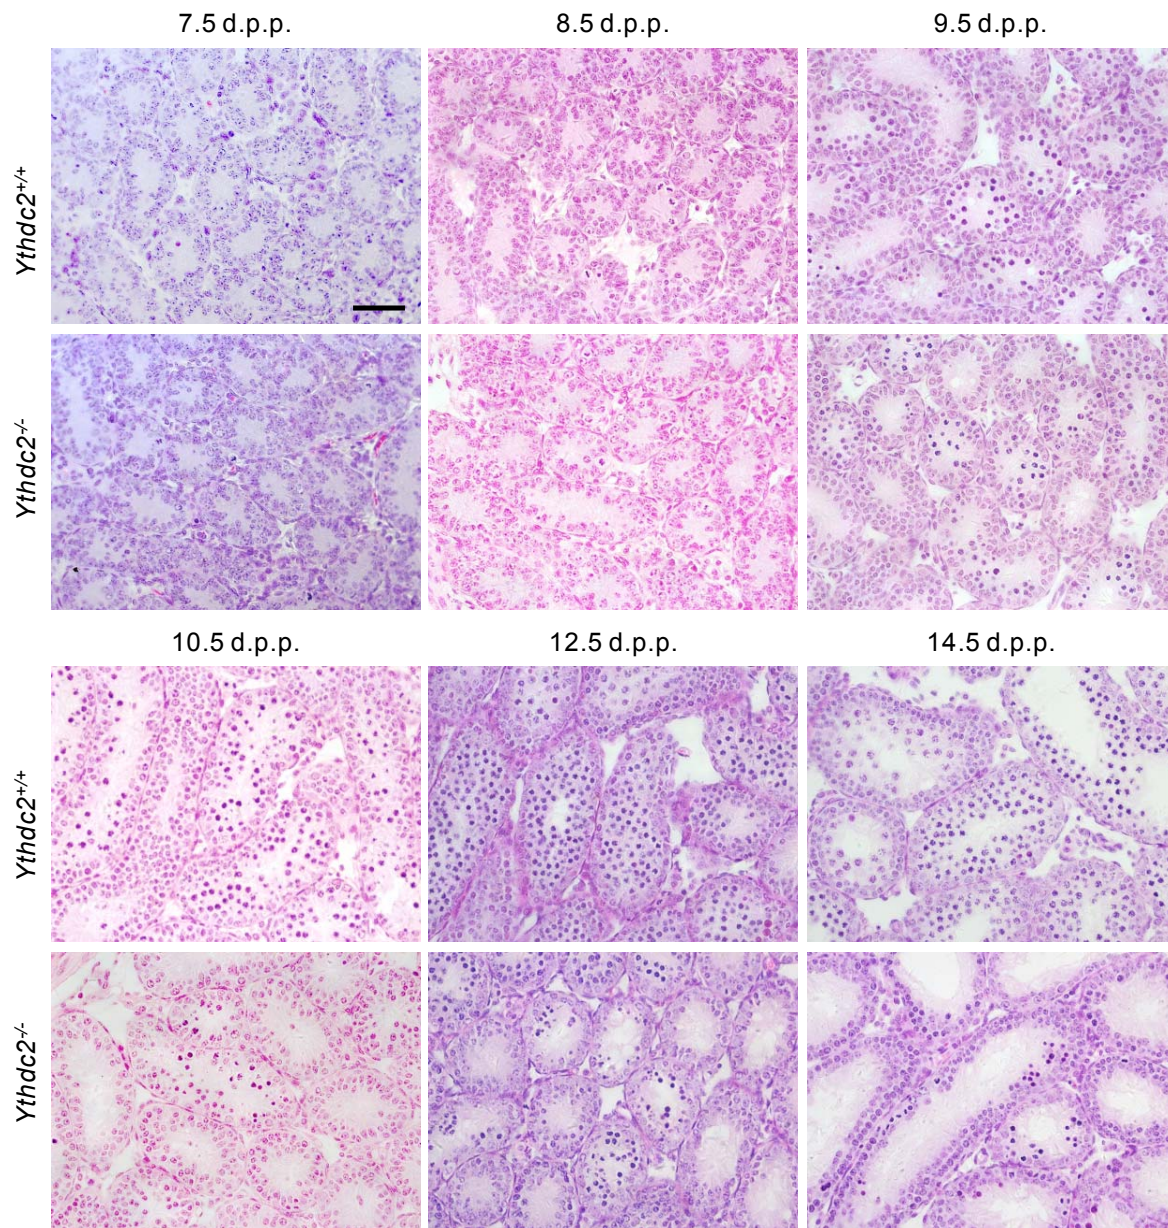

**Figure S7** Comparative histological analysis of testes of young *Ythdc2*<sup>+/+</sup> and *Ythdc2*<sup>-/-</sup> mice. H&E staining of testes sections at 7.5-14.5 d.p.p. Scale bar 50  $\mu$ m.
