# Supplementary material
Source: PubMed Central journal article supplement (PMC5587856)
Supplement: cr201799x8.pdf [file cr201799x8.pdf]

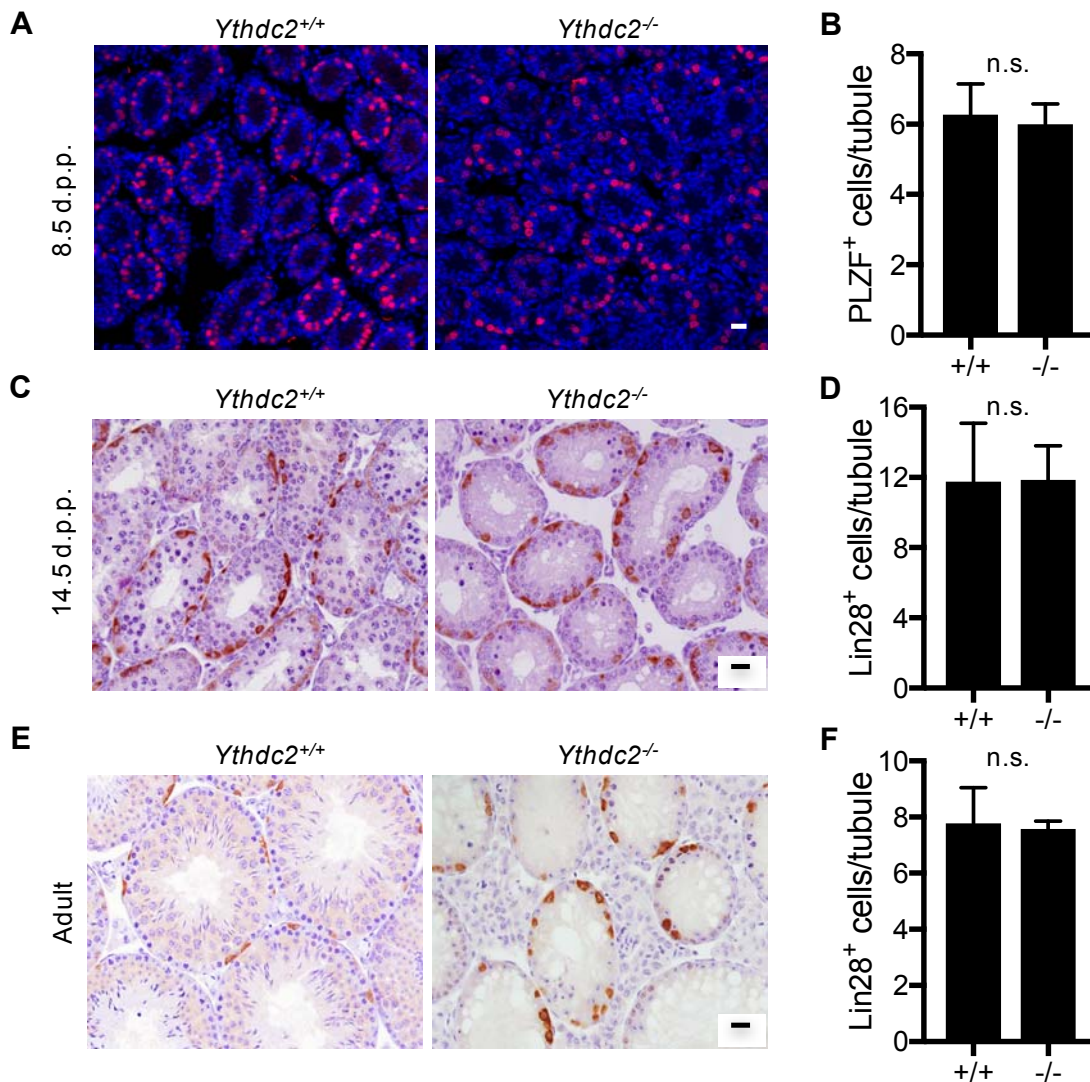

**Figure S8** *Ythdc2*-deficient mice show normal spermatogonia. **(A)** PLZF staining (red) in 8.5 d.p.p. *Ythdc2*<sup>+/+</sup> and *Ythdc2*<sup>-/-</sup> testes. DNA was stained with Hoechst (blue). **(B)** Quantification of PLZF positive cells for **(A)**. Error bars, mean  $\pm$  sd,  $n = 3$ , biological replicates, n.s., non-significant (Student's *t*-test). **(C, E)**, Lin28 staining (red) in 14.5 d.p.p. and adult *Ythdc2*<sup>+/+</sup> and *Ythdc2*<sup>-/-</sup> testes, respectively. Sections were counterstained with hematoxylin. **(D)** and **(F)**, Quantification of Lin28 positive cells for **(C)** and **(E)**. Error bars, mean  $\pm$  sd,  $n = 3$ , biological replicates, n.s., non-significant (Student's *t*-test). Scale bar, 20  $\mu$ m.
