# Supplementary material
Source: PubMed Central journal article supplement (PMC5587856)
Supplement: cr201799x9.pdf [file cr201799x9.pdf]

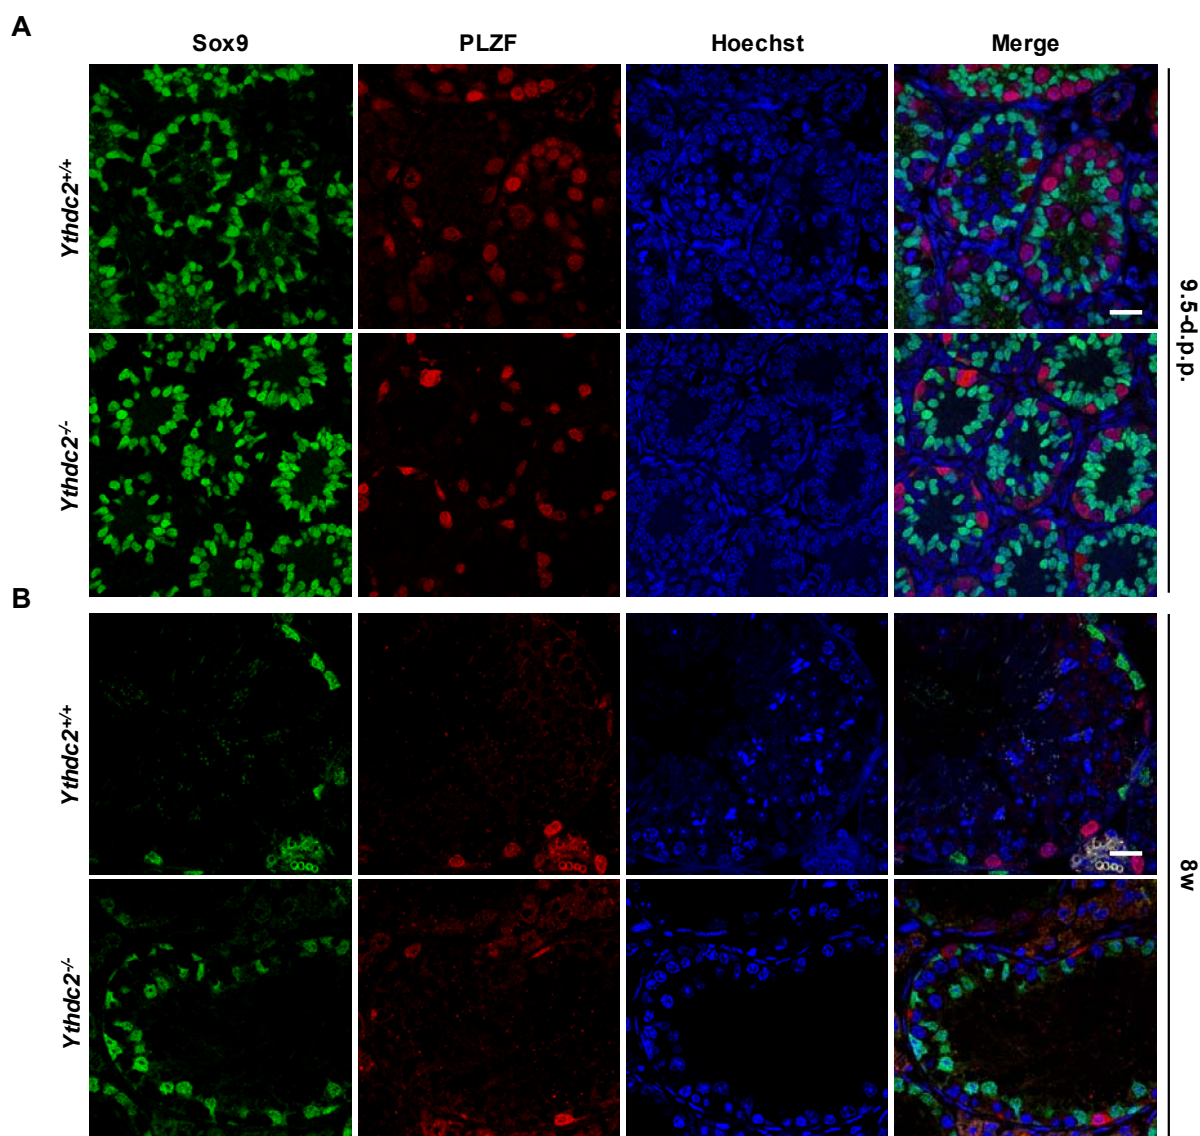

**Figure S9** *Ythdc2*-deficient mice show normal sertoli cells. **(A-B)** Sox9 (green) and PLZF (red) staining in **(A)** 9.5 d.p.p. and **(B)** adult *Ythdc2*<sup>+/+</sup> and *Ythdc2*<sup>-/-</sup> testes. DNA was stained with Hoechst (blue). Scale bar, 20  $\mu$ m.
