# Supplementary material
Source: PubMed Central journal article supplement (PMC5587856)
Supplement: cr201799x10.pdf [file cr201799x10.pdf]

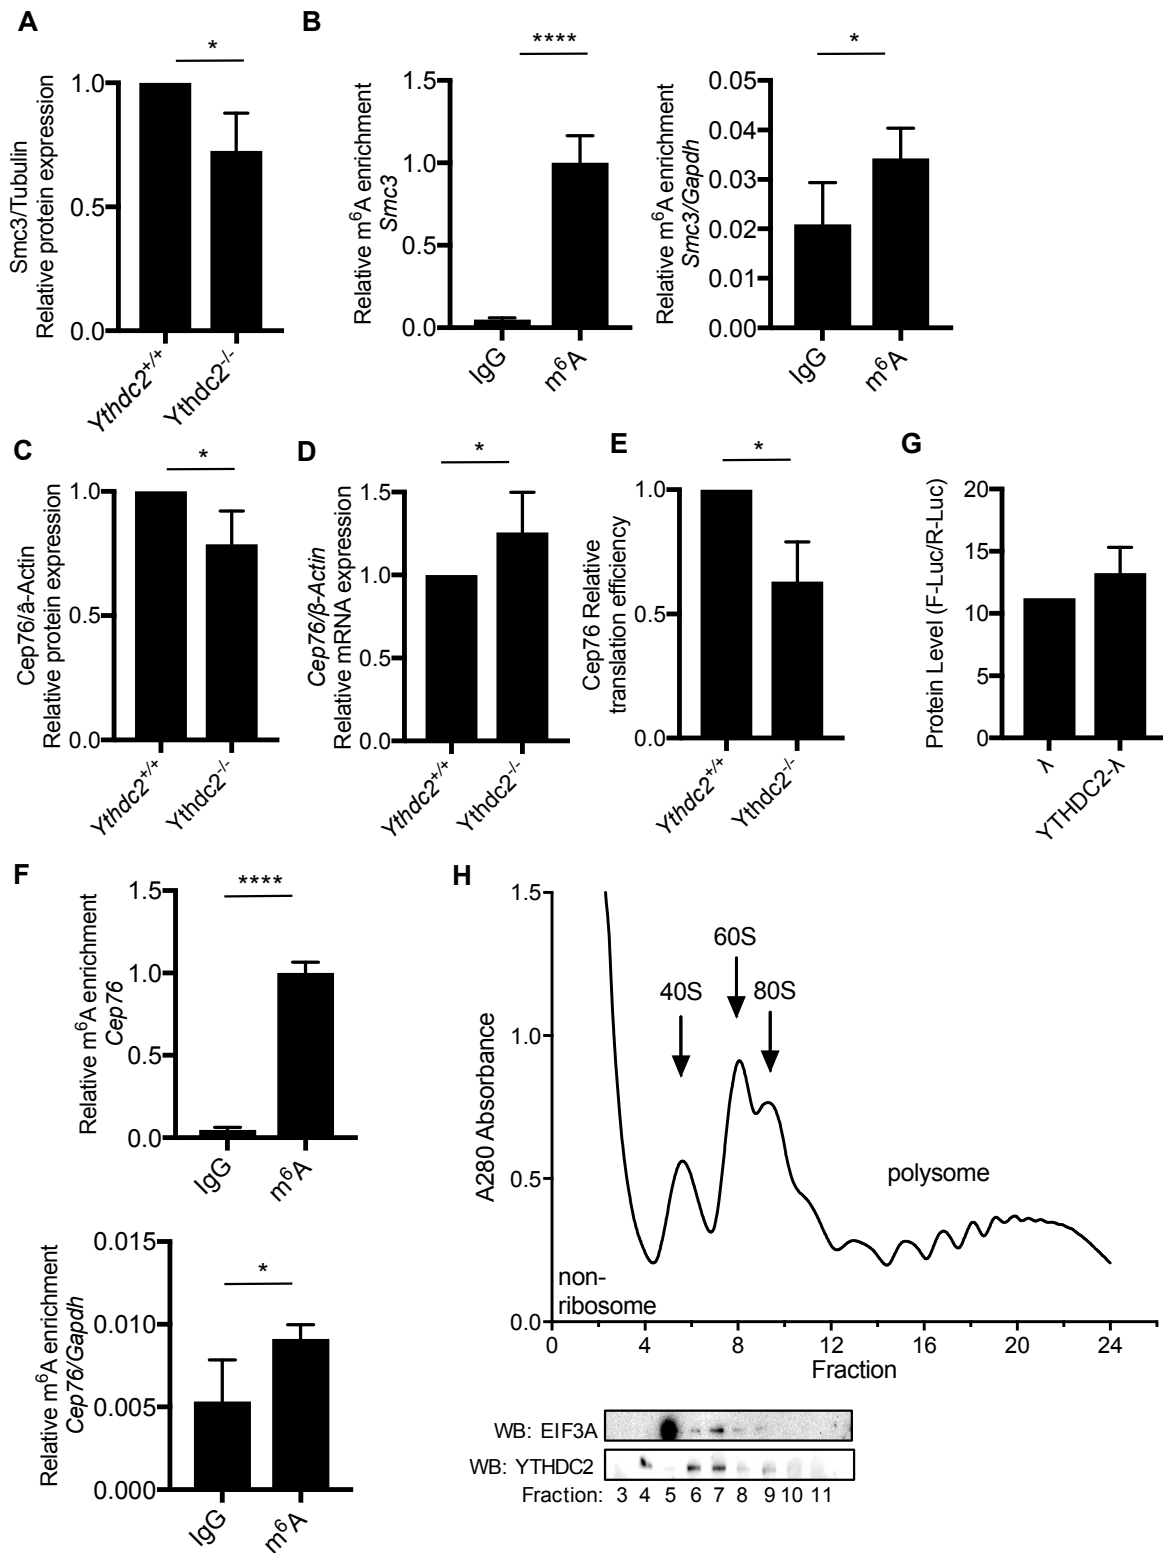

**Figure S10** (Supplement to Figure 4) YTHDC2 affects the translation efficiency and stability of its targets. **(A)** Protein levels of Smc3 normalized to Tubulin in *Ythdc2*<sup>+/+</sup> and *Ythdc2*<sup>-/-</sup> mice . Error bars, mean  $\pm$  sd,  $n = 3$ .  $*P < 0.05$  (Student's *t*-test). **(B)** Enrichment of m<sup>6</sup>A in Smc3, determined by qRT-PCR. Figure shows raw m<sup>6</sup>A enrichment of Smc3 (left), as has been convention for literature thus far, as well as m<sup>6</sup>A enrichment normalized to Gapdh, an unmethylated gene (right). Error bars, mean  $\pm$  sd,  $n = 4$ .  $****P < 0.001$ ,  $*P < 0.05$  (Student's *t*-test). **(C-E)** protein level ( $n = 3$ ), mRNA level ( $n = 6$ ), and translation efficiency (protein level / mRNA level) of Cep76. Error bars, mean  $\pm$  sd,  $*P < 0.05$  (Student's *t*-test). **(F)** Enrichment of m<sup>6</sup>A in Cep76, determined by qRT-PCR. Figure shows raw m<sup>6</sup>A enrichment of Cep76 (left), as well as m<sup>6</sup>A enrichment normalized to Gapdh, an unmethylated gene (right). Error bars, mean  $\pm$  sd,  $n = 4$ .  $*P < 0.05$  (Student's *t*-test). **(G)** Protein level of F-Luc normalized to R-luc 4 hours after post F-Luc induction. Error bars, mean  $\pm$  sd,  $n = 4$ ,  $****P < 0.001$ ,  $*P < 0.05$  (Student's *t*-test). **(H)** Polysome profiling of HeLa cells, and western blotting of YTHDC2 and EIF3A in each fraction.
