# Supplementary material
Source: PubMed Central journal article supplement (PMC5587856)
Supplement: cr201799x11.pdf [file cr201799x11.pdf]

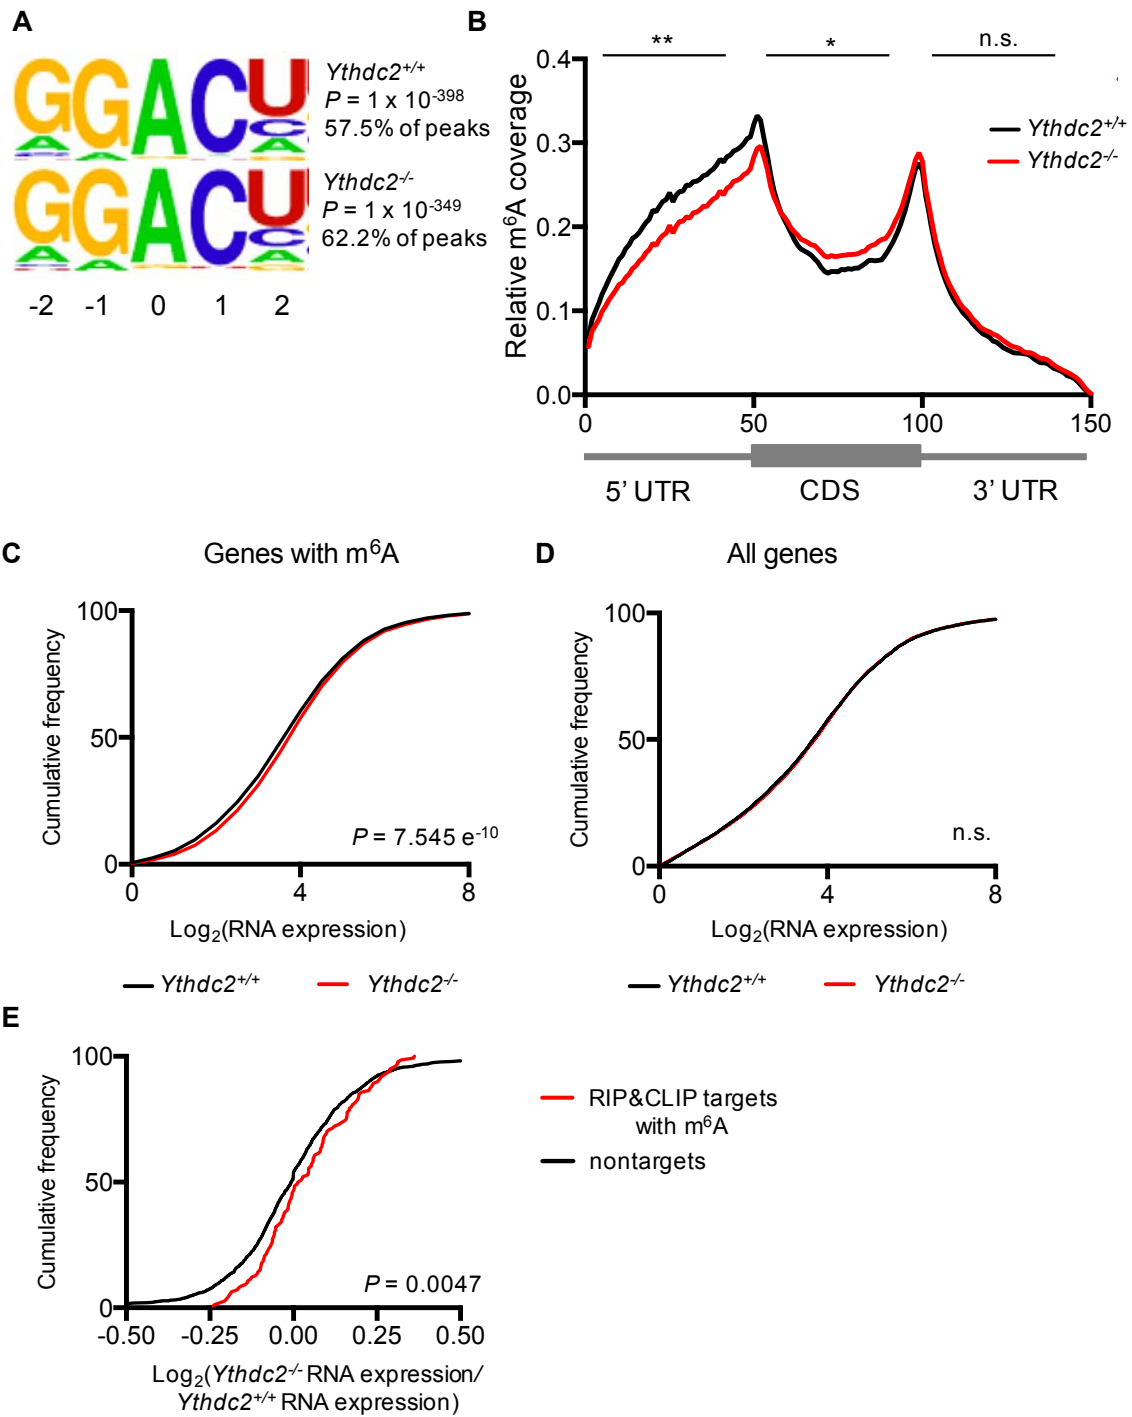

**Figure S11** m<sup>6</sup>A-seq of 8.5 d.p.p. *Ythdc2*<sup>+/+</sup> and *Ythdc2*<sup>-/-</sup> testes. **(A)** Consensus motif of m<sup>6</sup>A as identified by HOMER. **(B)** Metagene distribution of m<sup>6</sup>A peaks. \* $P < 0.05$ ,

**\*\* $P < 0.01$**  (Mann-Whitney U-test). **(C)** mRNA expression of genes with m<sup>6</sup>A in *Ythdc2*<sup>+/+</sup> and *Ythdc2*<sup>-/-</sup> mice (Mann-Whitney U-test). **(D)** mRNA expression of all genes in *Ythdc2*<sup>+/+</sup> and *Ythdc2*<sup>-/-</sup> mice. **(E)** Cumulative frequency of log<sub>2</sub>-fold changes of RNA expression upon *Ythdc2* depletion, in *Ythdc2* targets containing m<sup>6</sup>A determined by both RIP-seq and CLIP-seq, vs non-targets.
