# Supplementary material
Source: PubMed Central journal article supplement (PMC5587856)
Supplement: cr201799x12.pdf [file cr201799x12.pdf]

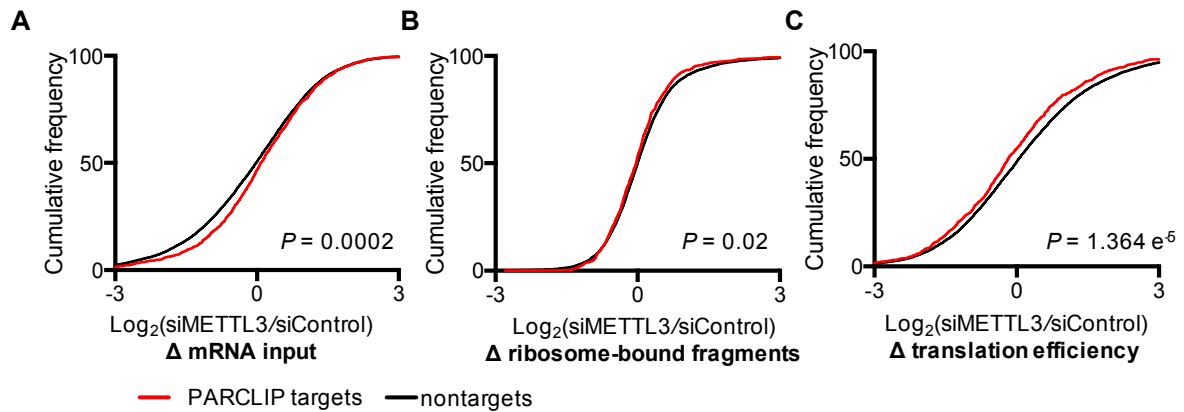

**Figure S12.** Effect of YTHDC2 on mRNA abundance and translation efficiency may be m<sup>6</sup>A dependent. Cumulative frequency of log<sub>2</sub>-fold changes of **(A)** mRNA input, **(B)** ribosome-bound fragments, and **(C)** translation efficiency (ratio of ribosome-bound fragments / mRNA input) between siMettl3 and siControl for YTHDC2 PARCLIP targets (red) vs nontargets (black) in HeLa cells. *P* values were calculated using two-sided Mann-Whitney U test.
