# Supplementary material
Source: PubMed Central journal article supplement (PMC5587856)
Supplement: cr201799x13.pdf [file cr201799x13.pdf]

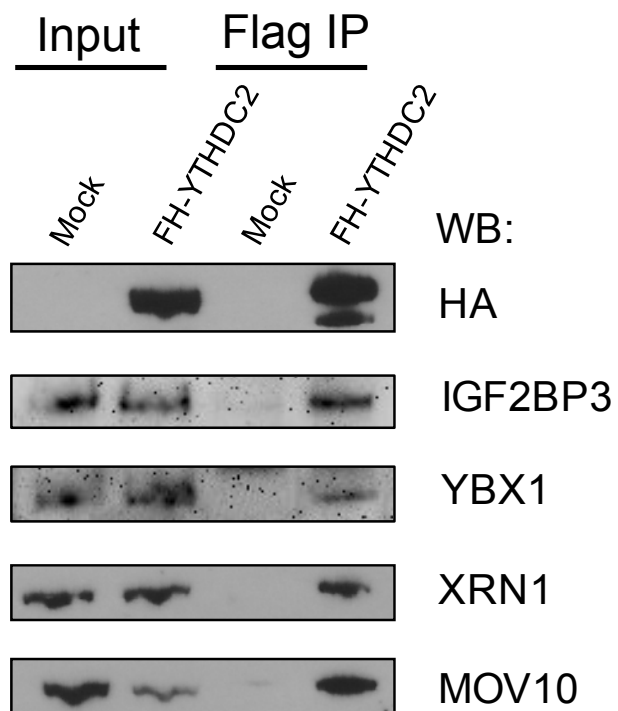

**Figure S13.** Confirmation of components of protein complex containing YTHDC2 obtained from tandem affinity purification followed by western blot.
