# Supplementary material
Source: PubMed Central journal article supplement (PMC5587856)

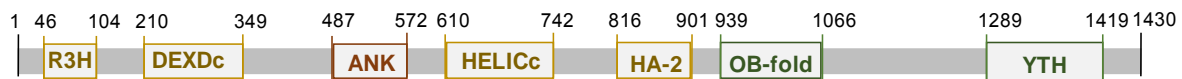

**Figure S1** Domains of YTHDC2 (<https://www.ncbi.nlm.nih.gov/gene/64848>).

Supplement: cr201799x1.pdf [file cr201799x1.pdf]

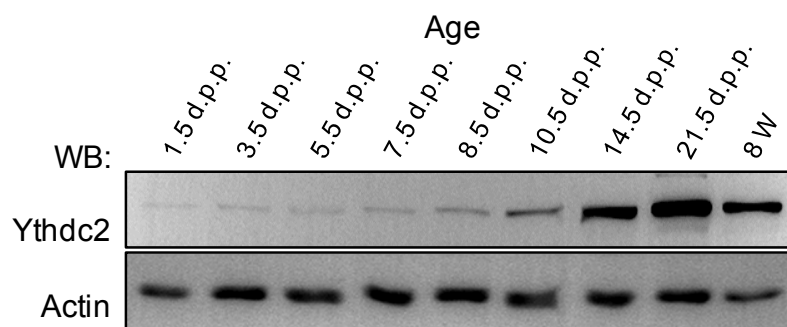

**Figure S5** Expression of Ythdc2 protein in wild type testes over time.

Supplement: cr201799x5.pdf [file cr201799x5.pdf]
